# Supplementary material for: High Antibiotic Resistance of Helicobacter pylori and Its Associated Novel Gene Mutations among the Mongolian Population
Source: PubMed Central journal article supplement (PMC7409119; doi:10.3390/microorganisms8071062), 2020-07-16
Supplement: microorganisms-08-01062-s001.pdf [file microorganisms-08-01062-s001.pdf]

## Supplementary Material

Table 1. Levofloxacin resistant strains variants

| No. | GyrA protein variants | Number of Resistant Strains |                 |
|-----|-----------------------|-----------------------------|-----------------|
|     |                       | with variant                | without variant |
| 1   | S5L                   | 12                          | 13              |
| 2   | V6I                   | 8                           | 17              |
| 3   | <b>N87K</b>           | 6                           | 19              |
| 4   | <b>A88P</b>           | 1                           | 24              |
| 5   | <b>D91N/Y/G</b>       | 15                          | 10              |
| 6   | D143E                 | 4                           | 21              |
| 7   | D161N                 | 3                           | 22              |
| 8   | M191I                 | 20                          | 5               |
| 9   | A197V                 | 1                           | 24              |
| 10  | V199I                 | 6                           | 19              |
| 11  | G208E                 | 7                           | 18              |
| 12  | E211K                 | 1                           | 24              |
| 13  | A231V                 | 1                           | 4               |
| 14  | A283V                 | 1                           | 24              |
| 15  | H354R                 | 22                          | 3               |
| 16  | E394G                 | 1                           | 24              |
| 17  | A379V                 | 1                           | 24              |
| 18  | R397Q                 | 9                           | 16              |
| 19  | I381V                 | 1                           | 24              |
| 20  | Q403P                 | 3                           | 22              |
| 21  | A407V                 | 3                           | 22              |
| 22  | M413I                 | 2                           | 23              |
| 23  | L452F/I               | 2                           | 23              |
| 24  | D454A/S/T             | 18                          | 7               |
| 25  | D455N                 | 1                           | 24              |
| 26  | D464Y/E               | 2                           | 23              |
| 27  | G468E                 | 14                          | 11              |
| 28  | L474F                 | 1                           | 24              |
| 29  | S482P                 | 1                           | 24              |
| 30  | P484Q                 | 11                          | 14              |
| 31  | R486C                 | 1                           | 24              |
| 32  | S492A/V               | 17                          | 8               |
| 33  | N495S                 | 2                           | 23              |
| 34  | A524V                 | 4                           | 21              |
| 35  | K527R                 | 18                          | 7               |

|    |         |    |    |
|----|---------|----|----|
| 36 | L536T   | 1  | 24 |
| 37 | S539N   | 17 | 8  |
| 38 | H569R   | 1  | 24 |
| 39 | A578S   | 1  | 24 |
| 40 | I587V   | 8  | 17 |
| 41 | A594D/T | 9  | 16 |
| 42 | P595S   | 2  | 23 |
| 43 | D610N   | 1  | 24 |
| 44 | N620K   | 3  | 22 |
| 45 | E632G   | 21 | 4  |
| 46 | I639V   | 1  | 24 |
| 47 | V643I   | 5  | 21 |
| 48 | R635FS  | 1  | 24 |
| 49 | S636FS  | 1  | 24 |
| 50 | C637S   | 1  | 24 |
| 51 | I639M   | 1  | 24 |
| 52 | V655I   | 17 | 8  |
| 53 | N659D   | 4  | 21 |
| 54 | H622Y   | 2  | 23 |
| 55 | H668Y   | 15 | 10 |
| 56 | I671L   | 3  | 22 |
| 57 | P676S   | 5  | 20 |
| 58 | E679D   | 24 | 1  |
| 59 | I683M   | 12 | 13 |
| 60 | T686N/S | 14 | 11 |
| 61 | T687A   | 12 | 13 |
| 62 | I691R   | 7  | 18 |
| 63 | K694R   | 15 | 10 |
| 64 | S708N   | 6  | 19 |
| 65 | D709G   | 2  | 23 |
| 66 | G711S   | 1  | 24 |
| 67 | G733E   | 23 | 2  |
| 68 | V741I/M | 19 | 6  |
| 69 | L746I   | 1  | 24 |
| 70 | G755S   | 11 | 14 |
| 71 | L766F   | 2  | 23 |
| 72 | R784K   | 13 | 12 |
| 73 | A790T   | 10 | 15 |
| 74 | N797D   | 11 | 14 |

|    |                           |    |    |
|----|---------------------------|----|----|
| 75 | Asn789_Ala790delinsLysThr | 1  | 24 |
| 76 | V802I                     | 1  | 24 |
| 77 | M803V                     | 11 | 14 |
| 78 | V805A                     | 11 | 14 |
| 79 | P814S                     | 1  | 24 |
| 80 | L817S                     | 2  | 23 |
| 81 | T819N/I                   | 13 | 12 |
| 82 | S820P                     | 3  | 22 |
| 83 | S821P/Q                   | 8  | 17 |
| 84 | A822T                     | 3  | 22 |
| 85 | Q823P/L                   | 5  | 20 |
| 86 | N824L                     | 20 | 5  |
| 87 | L825F                     | 20 | 5  |
| 88 | F826E                     | 20 | 5  |
